# Supplementary material for: Distinct neuroprotective and anti-inflammatory effects of Kampo formulas ninjinyoeito and juzentaihoto in depression-like SAMP8 mice
Source: Front Pharmacol. 2025 Oct 24;16:1600176. doi: 10.3389/fphar.2025.1600176 (PMC12592136; doi:10.3389/fphar.2025.1600176)
Supplement: Supplementary file 2 [file Table3.xlsx]

## Sheet: Table S3
Table S3. List of top 50 GO terms related to Figure 4 P8JS > P8JL
GOID	Term	#of genes	P-Value
GO:0007399	nervous system development	94	2.8222e-15
GO:0007409	axonogenesis	36	2.33099e-10
GO:0045944	positive regulation of transcription from RNA polymerase II promoter	178	3.49766e-10
GO:0035556	intracellular signal transduction	82	2.17706e-09
GO:0050804	modulation of synaptic transmission	34	7.09847e-08
GO:0048013	ephrin receptor signaling pathway	16	1.44741e-07
GO:0007420	brain development	55	2.31489e-07
GO:0016310	phosphorylation	93	8.74094e-07
GO:0010976	positive regulation of neuron projection development	39	1.02061e-06
GO:0007411	axon guidance	39	2.00614e-06
GO:0031175	neuron projection development	37	3.74154e-06
GO:0060997	dendritic spine morphogenesis	11	4.1694e-06
GO:0043161	proteasome-mediated ubiquitin-dependent protein catabolic process	42	5.03343e-06
GO:0016126	sterol biosynthetic process	13	6.52653e-06
GO:0043547	positive regulation of GTPase activity	38	6.68648e-06
GO:0015031	protein transport	91	1.11436e-05
GO:0030335	positive regulation of cell migration	47	1.15691e-05
GO:0032981	mitochondrial respiratory chain complex I assembly	19	1.16168e-05
GO:0008380	RNA splicing	48	3.52834e-05
GO:0000226	microtubule cytoskeleton organization	31	3.59465e-05
GO:0000398	mRNA splicing, via spliceosome	34	4.20257e-05
GO:0006122	mitochondrial electron transport, ubiquinol to cytochrome c	8	4.5426e-05
GO:0007613	memory	26	5.13523e-05
GO:0048812	neuron projection morphogenesis	21	5.90472e-05
GO:0016079	synaptic vesicle exocytosis	11	8.69195e-05
GO:0042776	mitochondrial ATP synthesis coupled proton transport	17	9.0188e-05
GO:0007030	Golgi organization	24	9.62839e-05
GO:0043087	regulation of GTPase activity	21	9.79256e-05
GO:0030705	cytoskeleton-dependent intracellular transport	9	0.000117001
GO:1900242	regulation of synaptic vesicle endocytosis	10	0.000127362
GO:0030036	actin cytoskeleton organization	42	0.000127806
GO:2000300	regulation of synaptic vesicle exocytosis	20	0.000133416
GO:0018105	peptidyl-serine phosphorylation	33	0.000138421
GO:0042391	regulation of membrane potential	25	0.000140718
GO:0001764	neuron migration	30	0.000144974
GO:0009060	aerobic respiration	18	0.000146017
GO:0018107	peptidyl-threonine phosphorylation	18	0.000146017
GO:0021766	hippocampus development	21	0.000157924
GO:0045893	positive regulation of transcription, DNA-templated	96	0.000169197
GO:0006468	protein phosphorylation	86	0.000181736
GO:0048511	rhythmic process	29	0.00019763
GO:0007628	adult walking behavior	14	0.000202289
GO:0032465	regulation of cytokinesis	13	0.000203601
GO:0090063	positive regulation of microtubule nucleation	6	0.000243645
GO:0007612	learning	18	0.000247526
GO:0060021	palate development	19	0.000252418
GO:0030182	neuron differentiation	41	0.000260891
GO:0042026	protein refolding	9	0.000268036
GO:0006629	lipid metabolic process	94	0.000269781
GO:0048813	dendrite morphogenesis	14	0.000388406
